# Supplementary material for: Morphological and Chemical Factors Related to Western Flower Thrips Resistance in the Ornamental Gladiolus
Source: MDPI journal article supplement (doi:10.3390/plants10071384), 2021-07-06
Supplement: s1 [file s1]

## Supplementary Materials

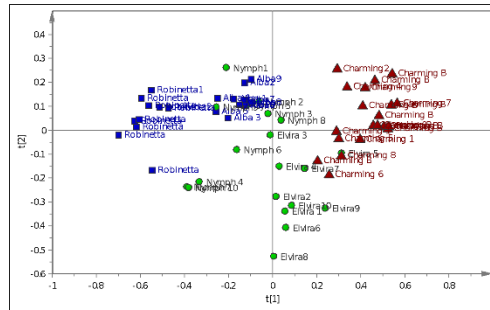

**Figure S1.** PCA score plot for 14 varieties based on thrips resistance of the varieties. (▲) susceptible varieties, (●) medium varieties and (■) resistant.

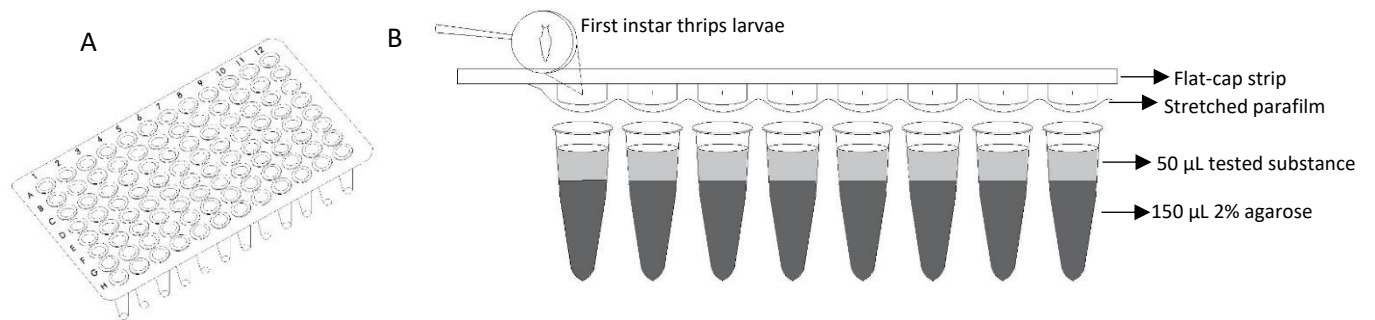

**Figure S2.** The *in-vitro* thrips bioassay; 96-well plates at top view (A) and at side view (B).
